# Supplementary material for: Hydrogen-atom abstraction from methane by stoichiometric early transition metal oxide cluster cations
Source: Royal Society of Chemistry journal article supplement (doi:10.1039/b924603g), 2010-01-01
Supplement: b924603g.pdf [file b924603g.pdf]

# Hydrogen-atom Abstraction from Methane by Stoichiometric Early Transition Metal Oxide Cations

Yan-Xia Zhao,<sup>ab</sup> Xiao-Nan Wu,<sup>ab</sup> Zhe-Chen Wang,<sup>ab</sup> Sheng-Gui He<sup>a\*</sup>, and Xun-Lei Ding,<sup>a\*</sup>

*<sup>a</sup>Beijing National Laboratory for Molecular Science,*

*State Key Laboratory for Structural Chemistry of Unstable and Stable Species,*

*Institute of Chemistry, Chinese Academy of Sciences, Beijing 100190, People's Republic of China,*

*<sup>b</sup>Graduate School of Chinese Academy of Sciences, Beijing 100039, People's Republic of China*

\*Author to whom correspondence should be addressed. E-mail: shengguihe@iccas.ac.cn,  
dingxl@iccas.ac.cn. Phone: 86-10-62536990. Fax: 86-10-62559373.

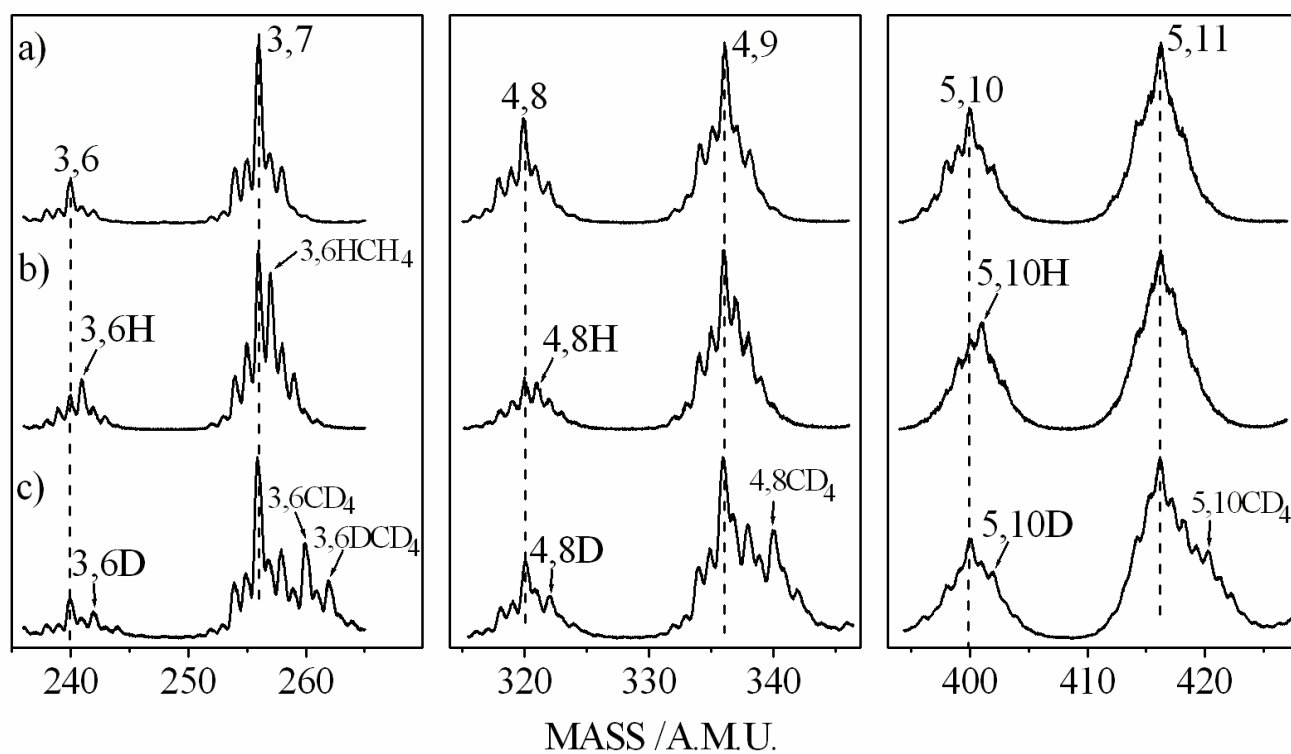

**Fig. S1** TOF mass spectra for reactions of  $Ti_3O_{6,7}^+$ ,  $Ti_4O_{8,9}^+$ , and  $Ti_5O_{10,11}^+$  with a) He, b)  $CH_4$ , and c)  $CD_4$ . Numbers  $m, n$  indicate  $Ti_mO_n^+$  and  $m, nX$  denote  $Ti_mO_nX^+$  in which  $X = H, D, CD_4, HCH_4$ , etc.

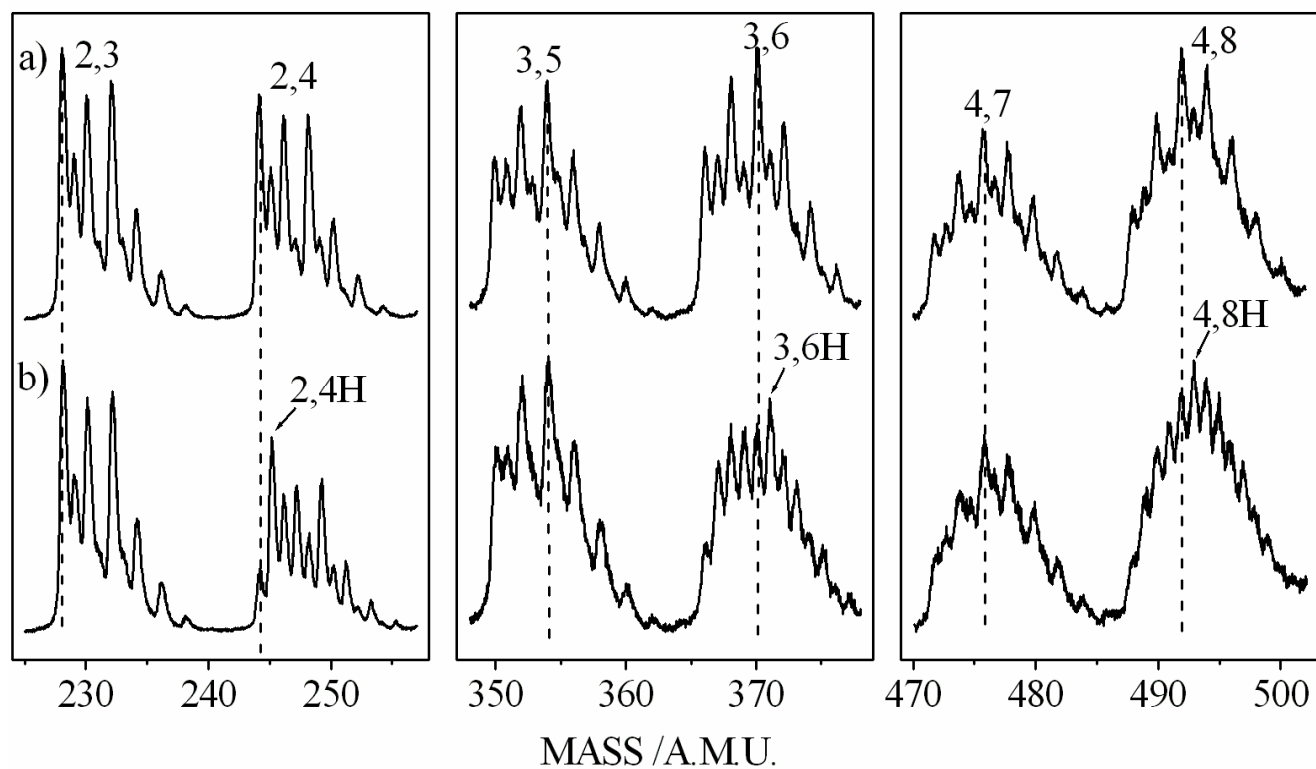

**Fig. S2:** TOF mass spectra for reactions of  $Zr_2O_{3,4}^+$ ,  $Zr_3O_{5,6}^+$ , and  $Zr_4O_{7,8}^+$  with a) He and b)  $CH_4$ .  
Numbers  $m, n$  denote  $Zr_mO_n^+$  and  $m, nX$  denote  $Zr_mO_nX^+$  in which  $X = H$ .

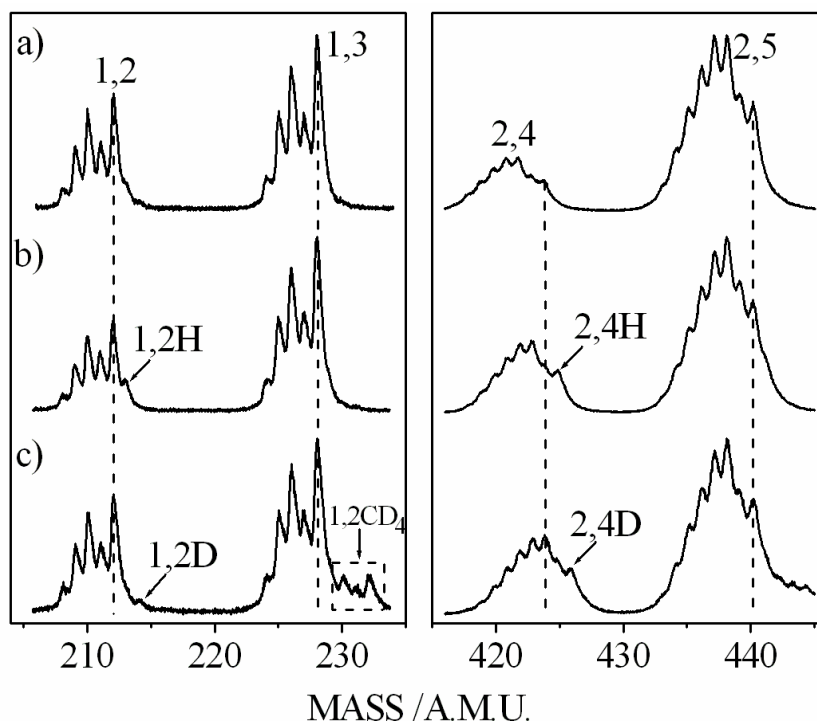

**Fig. S3:** TOF mass spectra for reactions of  $\text{HfO}_{2,3}^+$  and  $\text{Hf}_2\text{O}_{4,5}^+$  with a) He, b)  $\text{CH}_4$ , and c)  $\text{CD}_4$ .

Numbers  $m, n$  denote  $\text{Hf}_m\text{O}_n^+$  and  $m, nX$  denote  $\text{Hf}_m\text{O}_nX^+$  in which  $X = \text{H}, \text{D}, \text{CD}_4$ .

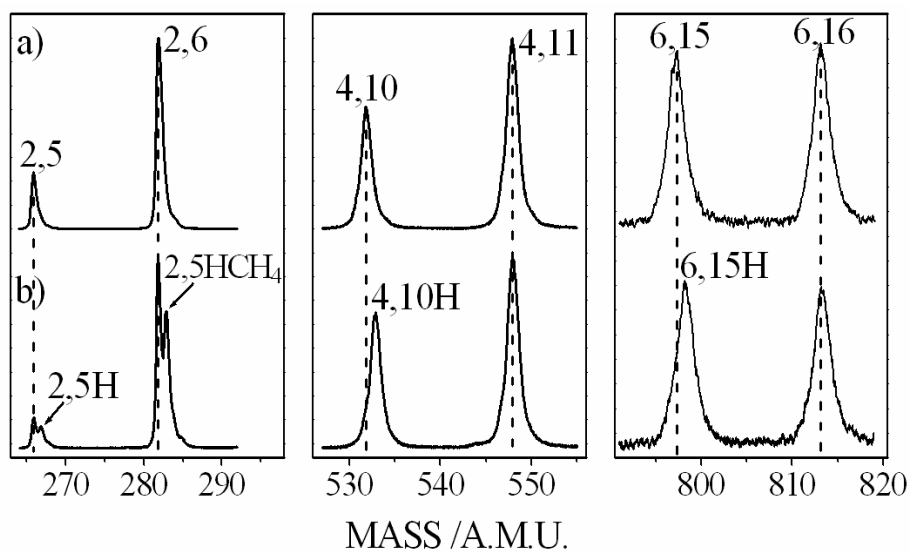

**Fig. S4:** TOF mass spectra for reactions of  $\text{Nb}_2\text{O}_{5,6}^+$ ,  $\text{Nb}_4\text{O}_{10,11}^+$ , and  $\text{Nb}_6\text{O}_{15,16}^+$  with a) He and b)  $\text{CH}_4$ .

Numbers  $m, n$  denote  $\text{Nb}_m\text{O}_n^+$  and  $m, nX$  denote  $\text{Nb}_m\text{O}_n\text{X}^+$  in which  $X = \text{H}, \text{HCH}_4$ .

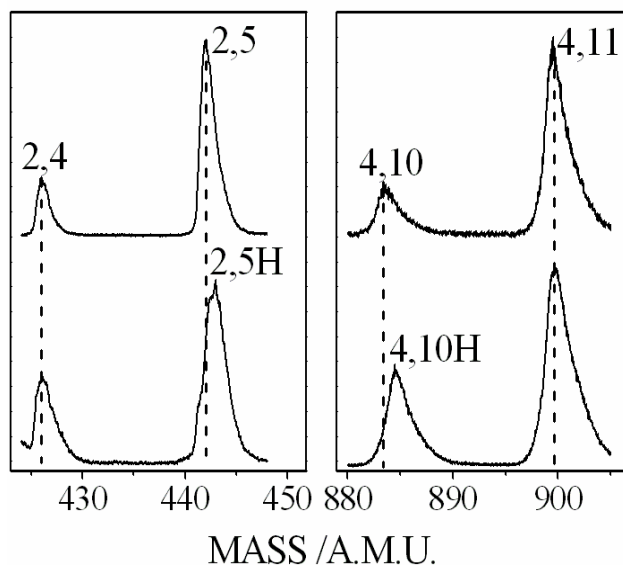

**Fig. S5:** TOF mass spectra for reactions of  $\text{Ta}_2\text{O}_{4.5}^+$  and  $\text{Ta}_4\text{O}_{10.11}^+$  with a) He and b)  $\text{CH}_4$ . Numbers  $m$ ,  $n$  denote  $\text{Ta}_m\text{O}_n^+$  and  $m, nX$  denote  $\text{Ta}_m\text{O}_n\text{X}^+$  in which  $X = \text{H}$ .

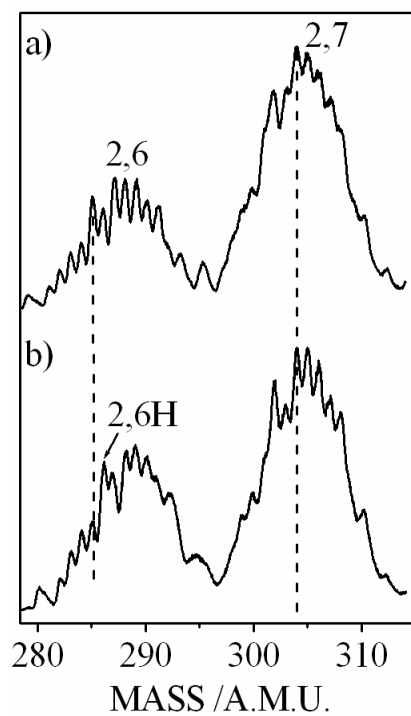

**Fig. S6:** TOF mass spectra for reactions of  $\text{Mo}_2\text{O}_{6,7}^+$  with a) He and b)  $\text{CH}_4$ . Numbers  $m, n$  denote  $\text{Mo}_m\text{O}_n^+$  and  $m, nX$  denote  $\text{Mo}_m\text{O}_n\text{X}^+$  in which  $X = \text{H}$ .

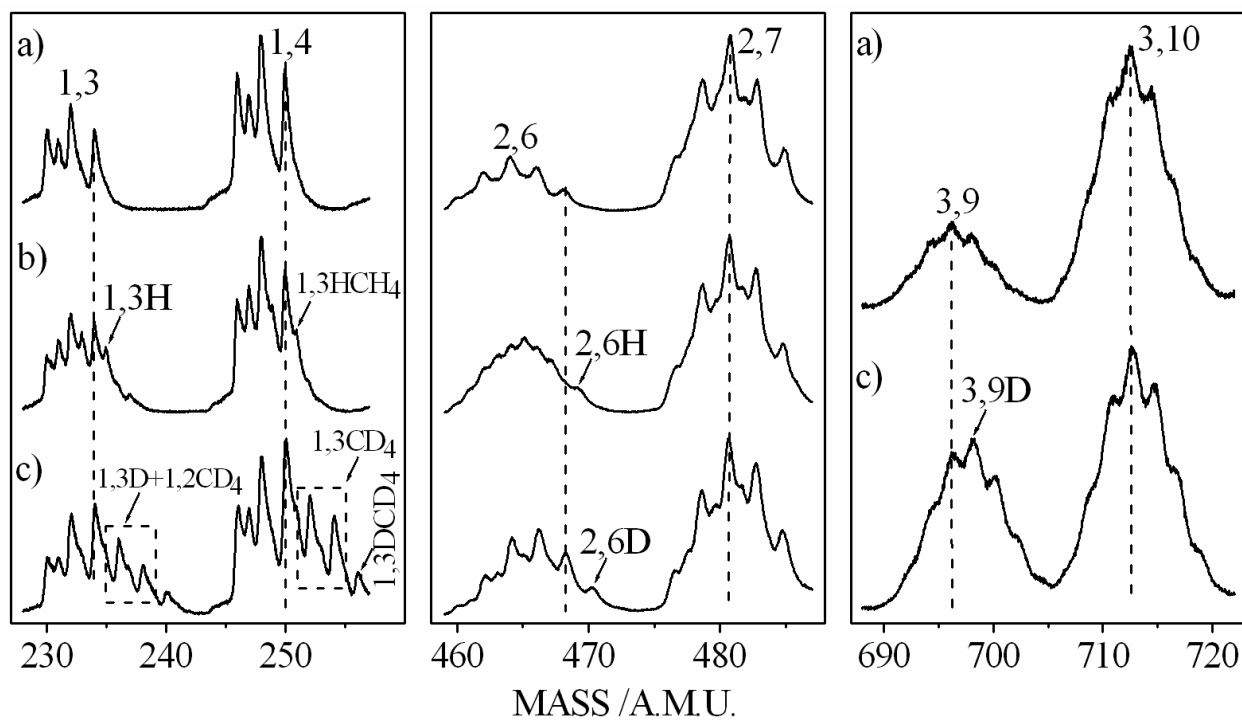

**Fig. S7:** TOF mass spectra for reactions of  $\text{WO}_{3,4}^+$ ,  $\text{W}_2\text{O}_{6,7}^+$ , and  $\text{W}_3\text{O}_{9,10}^+$  with a) He, b)  $\text{CH}_4$ , and c)  $\text{CD}_4$ . Numbers  $m, n$  denote  $\text{W}_m\text{O}_n^+$  and  $m, nX$  denote  $\text{W}_m\text{O}_n\text{X}^+$  in which  $X = \text{H}, \text{D}, \text{CD}_4, \text{HCH}_4$ , etc.



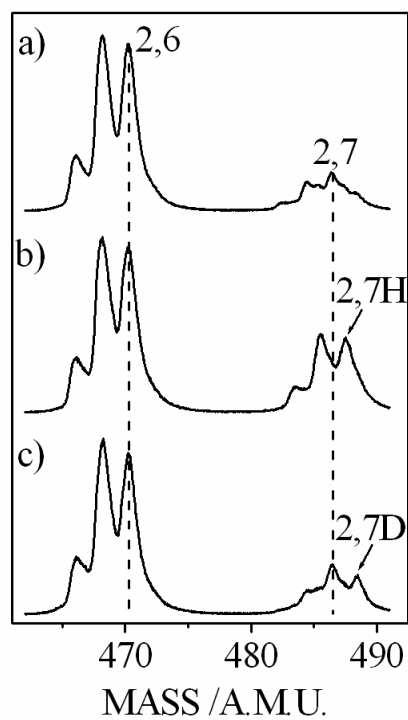

**Fig. S8:** TOF mass spectra for reactions of  $\text{Re}_2\text{O}_{6,7}^+$  with a) He, b)  $\text{CH}_4$ , and c)  $\text{CD}_4$ . Numbers  $m, n$  denote  $\text{Re}_m\text{O}_n^+$  and  $m, nX$  denote  $\text{Re}_m\text{O}_nX^+$  in which  $X = \text{H}, \text{D}$ .
